# Supplementary material for: Formation of Recalcitrant Compounds during Anaerobic Digestion of Thermally Pre-Treated Sludge: A Critical Macromolecular and Structural Study
Source: MDPI journal article supplement (doi:10.3390/ijerph20010558), 2022-12-29
Supplement: s1 [file s1]

## **Supporting Information**

### **Formation of recalcitrant compounds during anaerobic digestion of thermally pre-treated sludge: A macromolecular and a structural study**

E. Ortega-Martínez<sup>a</sup>, R. Chamy<sup>a, b</sup>, D. Jeison<sup>a\*</sup>

<sup>a</sup> Escuela de Ingeniería Bioquímica, Pontificia Universidad Católica de Valparaíso, Avenida Brasil 2085, Valparaíso, Chile.

<sup>b</sup> Núcleo Biotecnología Curauma, Pontificia Universidad Católica de Valparaíso, Avenida Universidad 330, Valparaíso, Chile.

\*Corresponding author (e-mail address: david.jeison@pucv.cl).

Table S1. Summary of the parameters of operation for CAD and TH-AD digesters.

|                                                                 | CAD              | TH-AD            |
|-----------------------------------------------------------------|------------------|------------------|
| Working Volume (L)                                              | 1                | 1                |
| HRT (days)                                                      | 33               | 25               |
| Organic loading rate (g VS L <sup>-1</sup> days <sup>-1</sup> ) | 3.0              | 3.4              |
| Stirring speed (RPM)                                            | 150              | 150              |
| Stirring device                                                 | Orbital Agitator | Orbital Agitator |
| Operation time (days)                                           | 260              | 260              |

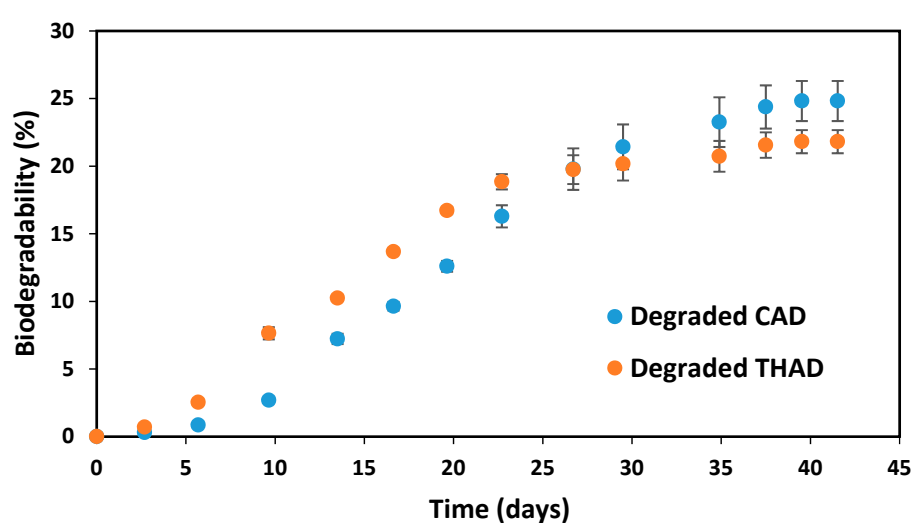

Figure S1. Biodegradability of the digestates of CAD and TH-AD digesters. Error bars indicate standard deviation between replicas.

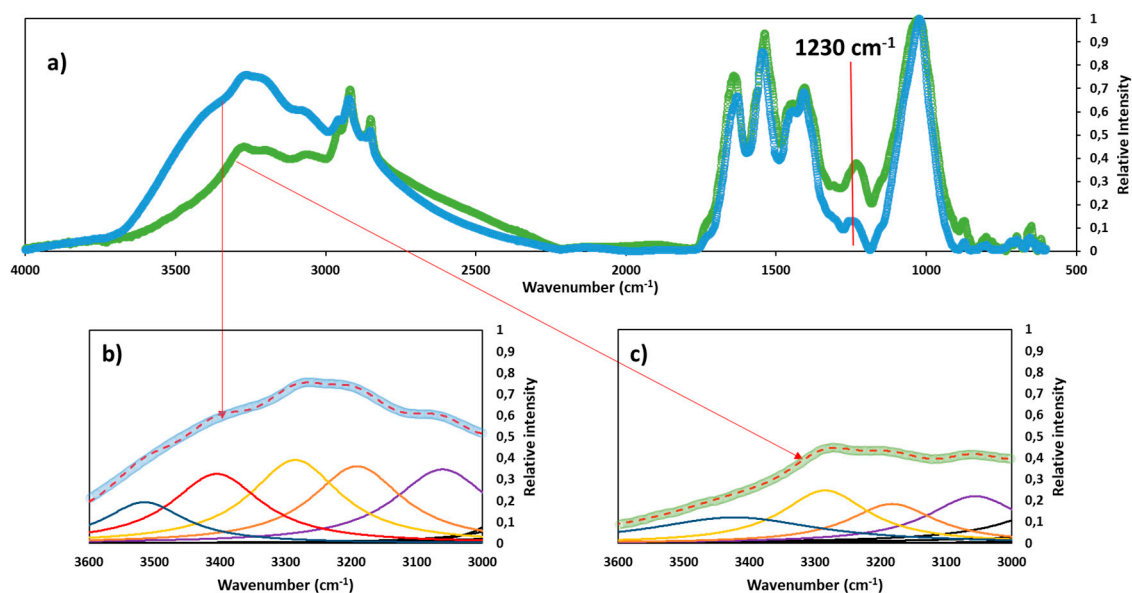

Figure S2. a) FTIR of the untreated, undigested sludge, i.e., CAD digester feed (green lines); and effluent of CAD digester, i.e., anaerobically digested sludge in CAD digester (blue lines). The deconvoluted spectrum with the fitted component band is also shown, for b) the digested sludge and c) the undigested sludge.

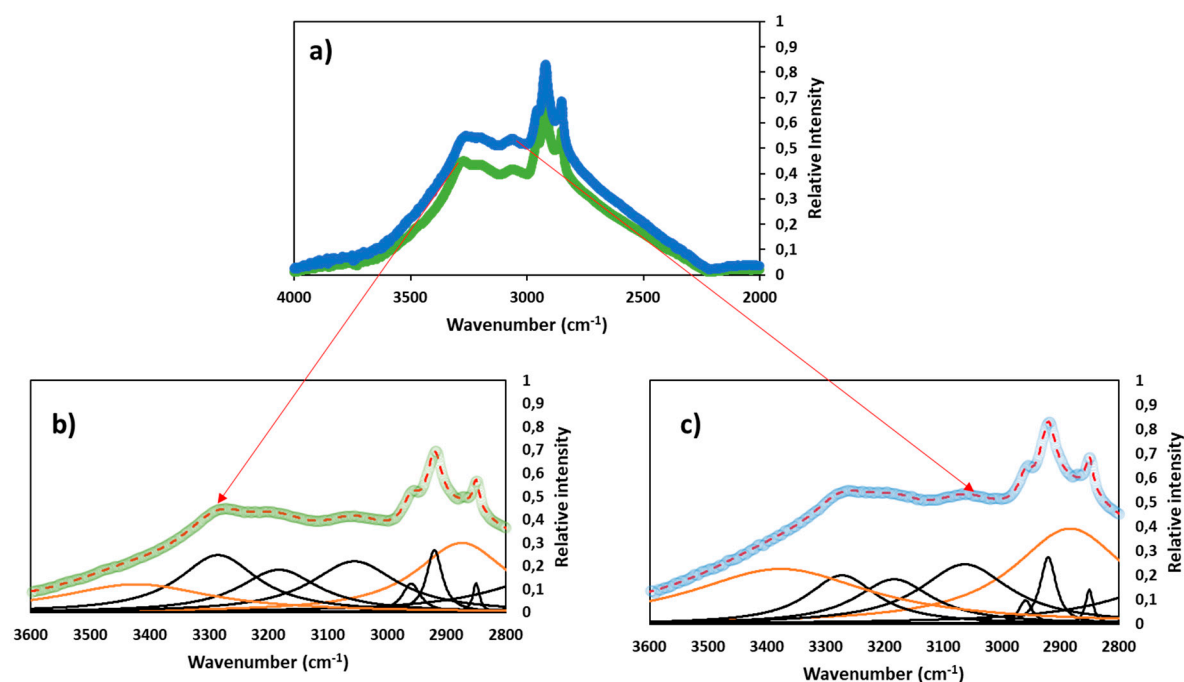

Figure S3. a) FTIR of the sludge before (green lines) and after (blue lines) thermal treatment, during TH-AD process, between the range of 4000  $\text{cm}^{-1}$ . to 2000  $\text{cm}^{-1}$ . The deconvoluted spectrum with the fitted component band is also shown, for b) the pre-treated sludge and c) the untreated sludge.
